# Supplementary material for: A novel dual-channel chemosensor for CN− based on rhodamine B hydrazide derivatives and its application in bitter almond
Source: Royal Society of Chemistry journal article supplement (doi:10.1039/c7ra09174e), 2017-01-01
Supplement: c7ra09174e1.pdf [file c7ra09174e1.pdf]

*Electronic Supplementary Material*

**A novel dual-channel chemosensor for  $\text{CN}^-$  based on  
Rhodamine B hydrazide derivatives and its  
application in bitter almond**

**Peng-Xiang Pei, Jing-Han Hu\*, Peng-Wei Ni, Jun-Xia Su, Chen Long, You Sun**

-----  
E-mail: [hujinghan62@163.com](mailto:hujinghan62@163.com)

-----  
*College of Chemical and Biological Engineering, Lanzhou Jiaotong University,  
Lanzhou, gansu, 730070, P. R. China*

## CONTENTS

|                                                                                         |   |
|-----------------------------------------------------------------------------------------|---|
| 1. Influence of pH on the fluorescence of <b>PW</b> and <b>PW+ CN<sup>-</sup></b> ..... | 3 |
| 2. <sup>1</sup> H NMR spectra of <b>PW</b> .....                                        | 4 |
| 3. ESI-MS spectra of <b>PW</b> .....                                                    | 5 |
| 4. ESI-MS spectra of <b>PW +CN<sup>-</sup></b> .....                                    | 6 |
| 5. <sup>13</sup> C NMR spectra of <b>PW</b> .....                                       | 7 |
| 6. Table <b>S1</b> .....                                                                | 8 |

1. Influence of pH on the fluorescence of **PW** and **PW+ CN<sup>-</sup>**

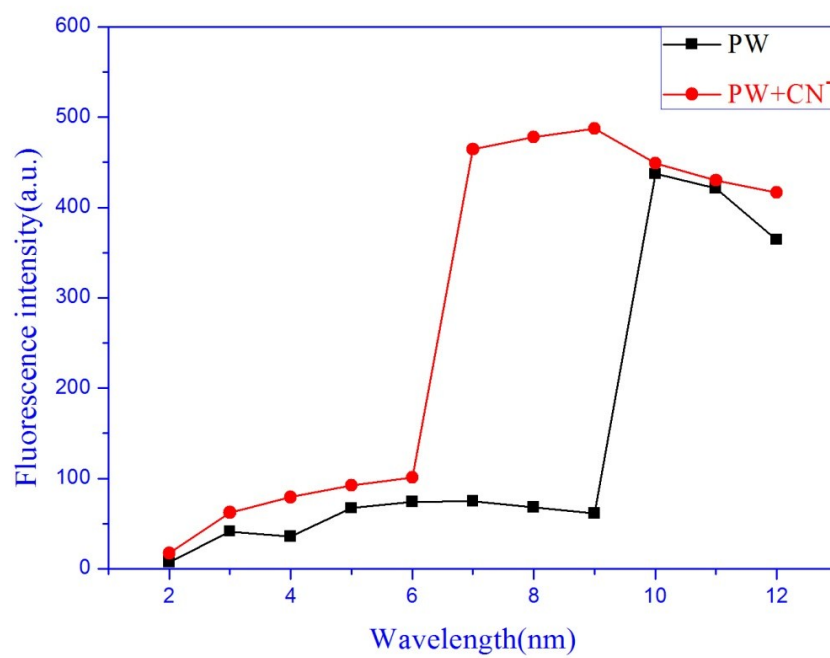

**Fig. S1** Influence of pH on the fluorescence of **PW** and **PW+CN<sup>-</sup>**.

## 2. $^1\text{H}$ NMR spectra of PW

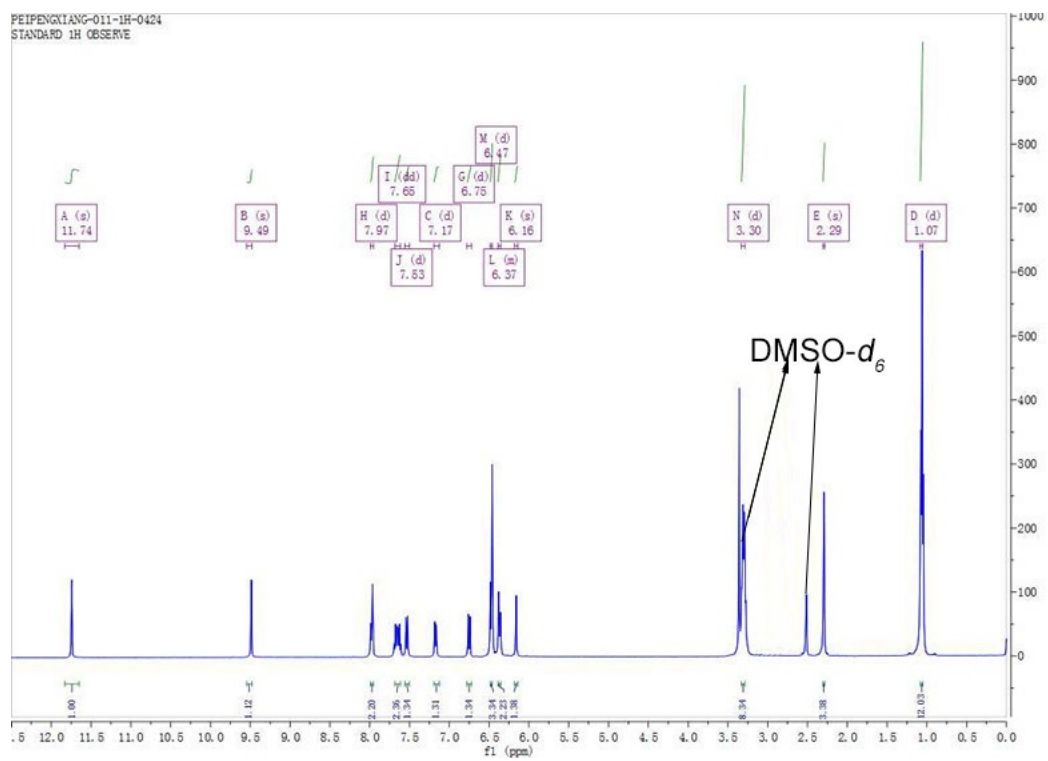

Fig. S2  $^1\text{H}$  NMR spectra of PW

### 3. ESI-MS spectra of PW

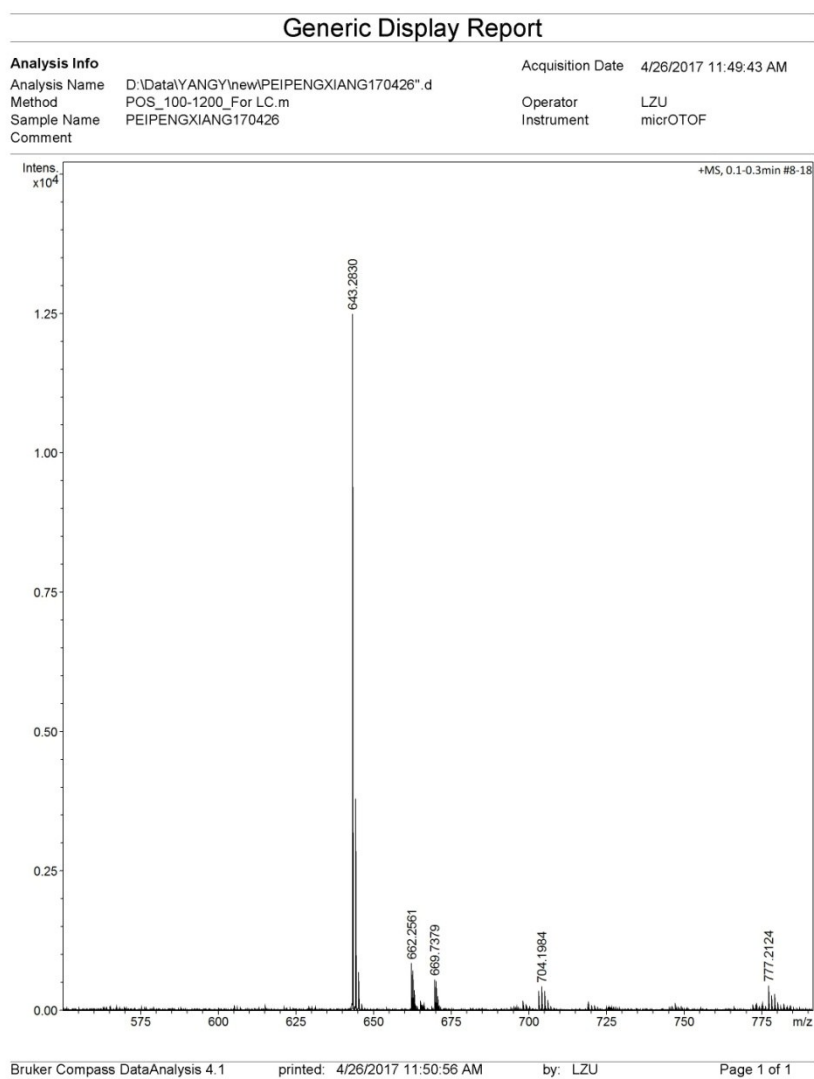

**Fig. S3 ESI-MS spectra of PW**

#### 4. ESI-MS spectra of PW+CN<sup>-</sup>

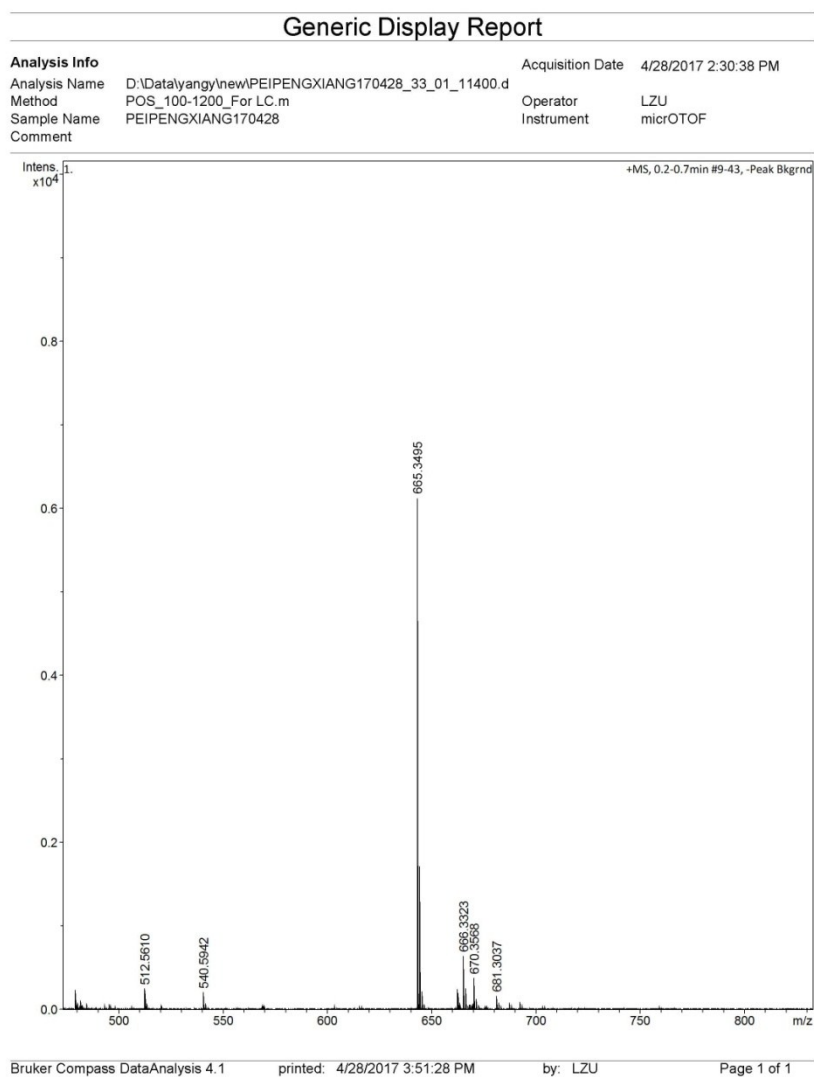

**Fig. S4 ESI-MS spectra of PW+CN<sup>-</sup>**

## 5. $^{13}\text{C}$ NMR spectra of PW

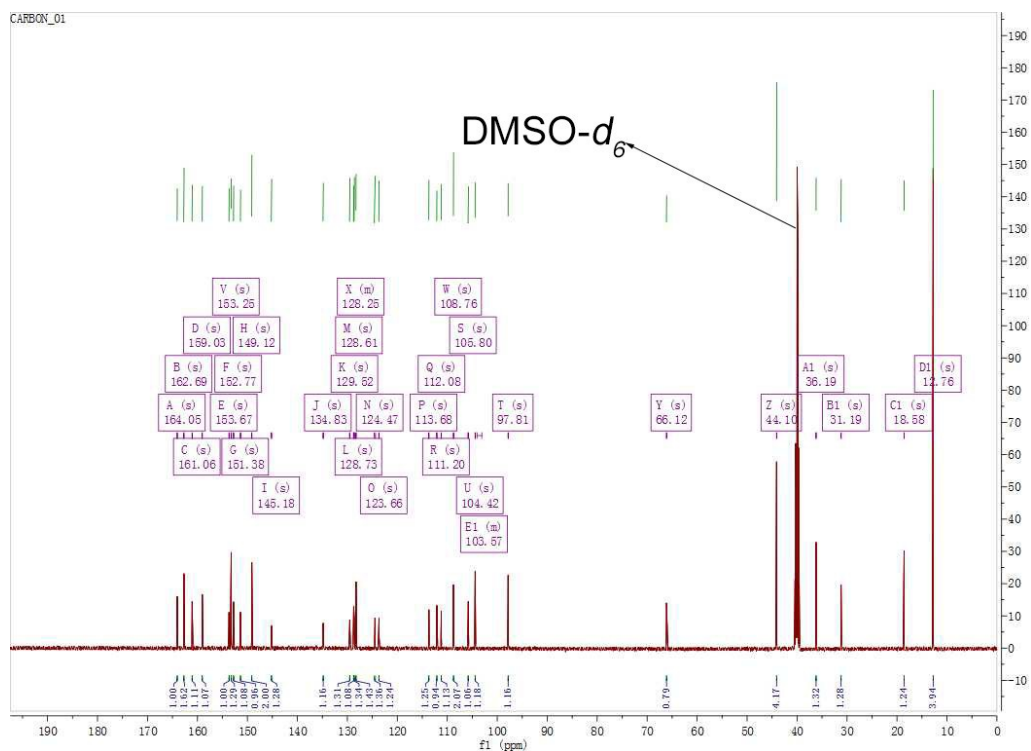

Fig. S5  $^{13}\text{C}$  NMR spectra of PW

A part of the literatures was provided in the followed table:

**Table S1:**

| Journal<br>Year.<br>Volume.<br>Page.                          | Response<br>channel                           | Solvent<br>medium                   | Detection<br>limits       | Application                         |
|---------------------------------------------------------------|-----------------------------------------------|-------------------------------------|---------------------------|-------------------------------------|
| This work                                                     | Colorimetric<br>and fluorometric<br>(off-on)  | DMSO/H <sub>2</sub> O<br>(1:1, v/v) | $1.592 \times 10^{-7}$ M  | Test strips<br>and bitter<br>almond |
| <i>J. Fluoresc.</i><br><b>26</b> (2016)<br>1857-1864          | Colorimetric                                  | DMSO/EtOH<br>(v/v=1:9)              | $3.07 \times 10^{-7}$ M   | —                                   |
| <i>Sens<br/>Actuators B.</i><br><b>202</b> (2014)<br>645-655. | Colorimetric<br>and fluorometric<br>(off-on)  | DMSO/bis-tris<br>buffer (8/2, v/v)  | $7.8 \times 10^{-7}$ M    | —                                   |
| Tetrahedron<br><b>70</b> (2014)<br>1889-1894                  | Colorimetric<br>and fluorometric<br>(off-on)  | DMSO/H <sub>2</sub> O<br>(v/v=9:1)  | $4.0 \times 10^{-7}$ M    | —                                   |
| Tetrahedron<br><b>72</b> (2016)<br>1244-1248                  | Colorimetric<br>and fluorometric<br>(on-off)) | CH <sub>3</sub> CN                  | $3.9024 \times 10^{-6}$ M | —                                   |

- [1] P. Gholamzadeh, G. M. Ziarani, N. Lashgari, A. Badiei, A. Shayesteh, M. Jafari, *J. Fluoresc.* **26** (2016) 1857-1864.
- [2] G. R. You, G. J. Park, S. A. Lee, Y. W. Choi, Y. S. Kim, J. J. Lee, C. Kim, *Sens Actuators B.* **202** (2014) 645-655.
- [3] P. Zhang, B. B. Shi, X. M. You, Y. M. Zhang, Q. Lin, H. Yao, T. B. Wei, *Tetrahedron* **70** (2014) 1889–1894.
- [4] S.Y. Gwon, B. A. Rao, H. S. Kim, Y. A. Son, S. H. Kim, *Spectrochim. Acta Part A* **144** (2015) 226-234.
